# Supplementary material for: Metabolization of Resolvin E4 by ω-Oxidation in Human Neutrophils: Synthesis and Biological Evaluation of 20-Hydroxy-Resolvin E4 (20-OH-RvE4)
Source: PubMed Central journal article supplement (PMC10714428; doi:10.1021/acsptsci.3c00201), 2023-11-20
Supplement: pt3c00201_si_001.pdf [file pt3c00201_si_001.pdf]

# **Metabolization of Resolvin E4 by $\omega$ -Oxidation in Human Neutrophils: Synthesis and Biological Evaluation of 20-Hydroxy-Resolvin E4 (20-OH-RvE4)**

*Amalie Føreid Reinertsen,<sup>†\*</sup> Stephania Libreros,<sup>§</sup> Robert Nshimiyimana,<sup>§</sup> Charles Nicholas Serhan,<sup>§</sup> and Trond Vidar Hansen<sup>†</sup>*

<sup>†</sup>Department of Pharmacy, Section for Pharmaceutical Chemistry, University of Oslo,  
P.O. Box 1068, 0316 Oslo, Norway

<sup>§</sup>Center for Experimental Therapeutics and Reperfusion Injury, Department of Anesthesiology, Perioperative and Pain Medicine, Brigham and Women's Hospital, Harvard Medical School, Boston, MA

\*For correspondence: Amalie Føreid Reinertsen, [a.f.reinertsen@farmasi.uio.no](mailto:a.f.reinertsen@farmasi.uio.no)

## **Table of contents**

|                                                              |      |
|--------------------------------------------------------------|------|
| General information.....                                     | S-2  |
| <sup>1</sup> H-, <sup>13</sup> C-, and COSY NMR Spectra..... | S-3  |
| UV-Vis Spectra.....                                          | S-9  |
| HPLC Chromatograms.....                                      | S-10 |
| HRMS Spectra.....                                            | S-12 |

**General information.** All commercially available reagents and solvents were used in the form they were supplied without any further purification, unless otherwise indicated. The stated yields are based on isolated material. All reactions were performed under an argon atmosphere using Schlenk techniques, unless stated otherwise. Reaction flasks were covered with aluminum foil during sensitive reactions and storage to minimize exposure to light. Thin layer chromatography was performed on silica gel 60 F254 aluminum-backed plates fabricated by Merck. Flash column chromatography was performed on silica gel 60 (40-63  $\mu\text{m}$ ) produced by Merck. NMR spectra were recorded on a Bruker AVII400 spectrometer at 400 MHz for  $^1\text{H}$  NMR and at 101 MHz for  $^{13}\text{C}$  NMR or a Bruker AVII600 spectrometer at 600 MHz for  $^1\text{H}$  NMR and at 151 MHz for  $^{13}\text{C}$  NMR. Coupling constants ( $J$ ) are reported in hertz and chemical shifts are reported in parts per million ( $\delta$ ) relative to the central residual protium solvent resonance in  $^1\text{H}$  NMR ( $\text{CDCl}_3 = \delta 7.26$  and  $\text{CD}_3\text{OD} = \delta 3.31$ ) and the central carbon solvent resonance in  $^{13}\text{C}$  NMR ( $\text{CDCl}_3 = \delta 77.00$  ppm and  $\text{CD}_3\text{OD} = \delta 49.00$ ). Optical rotations were measured using a Perkin Elmer 341 polarimeter. Mass spectra were recorded at 70 eV on Micromass Prospec Q or Micromass QTOF 2 W spectrometer using ESI as the method of ionization. High-resolution mass spectra were recorded at 70 eV on Micromass Prospec Q or Micromass QTOF 2W spectrometer using ESI as the method of ionization. HPLC-analyses were performed using a  $\text{C}_{18}$  stationary phase (Eclipse XDBC $_{18}$ , 4.6 x 250 mm, particle size 5  $\mu\text{m}$ , from Agilent Technologies), applying the conditions stated. The UV-Vis spectra were recorded using an Agilent Technologies Cary 8485 UV-VIS spectrophotometer using quartz cuvettes.

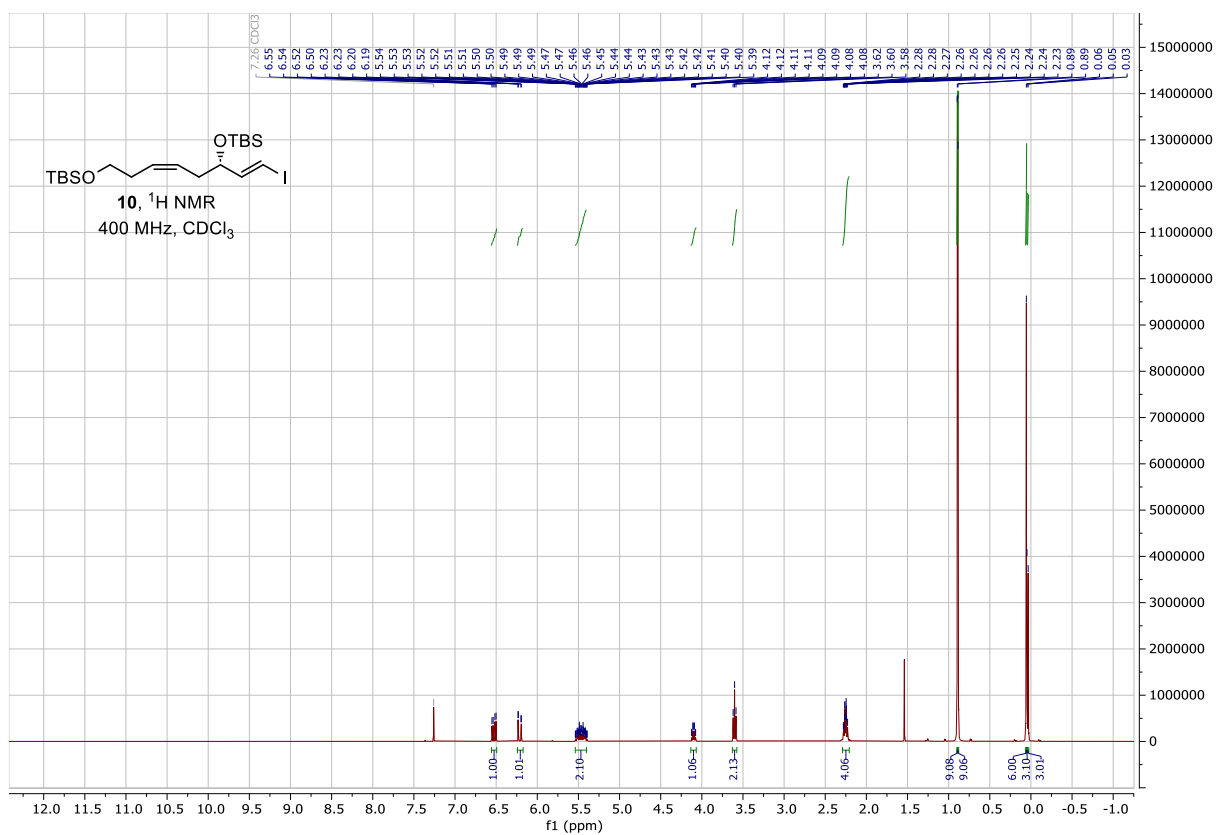

Figure S1  $^1\text{H}$  NMR spectrum of vinyl iodide **10**.

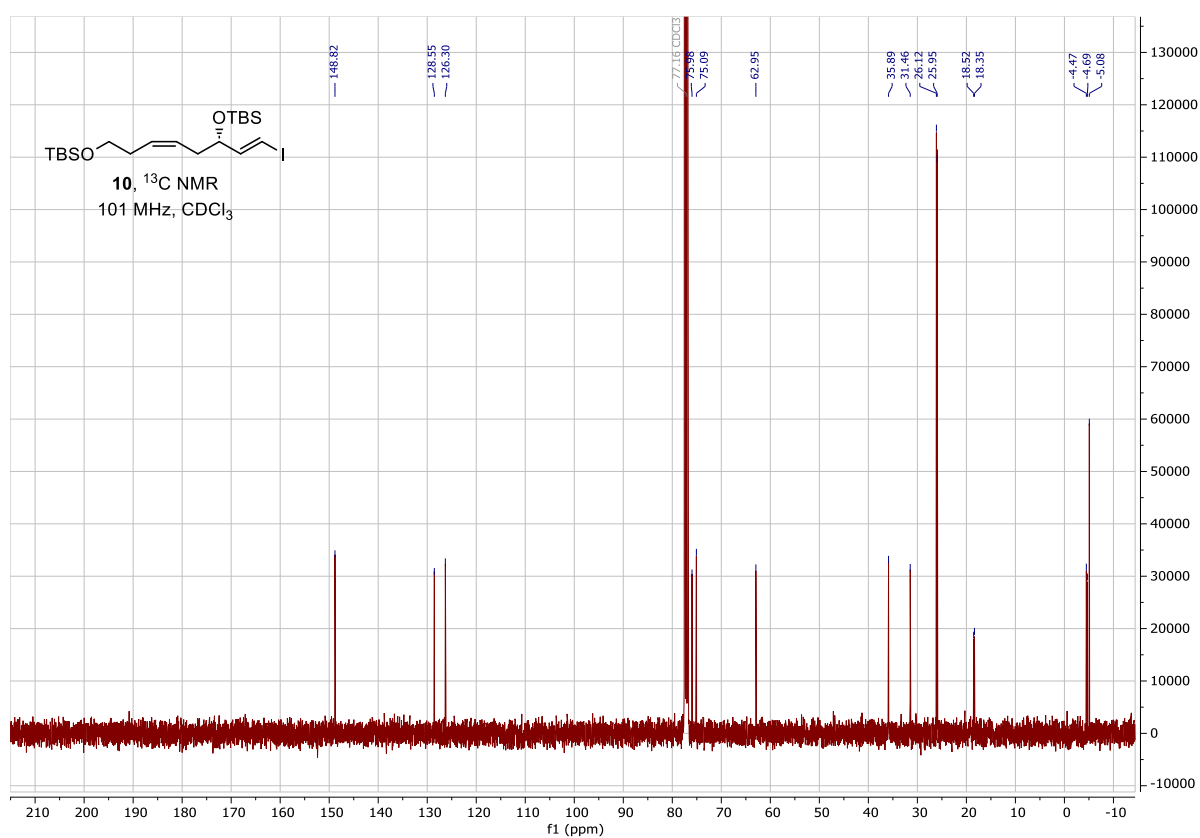

Figure S2  $^{13}\text{C}$  NMR spectrum of vinyl iodide **10**.

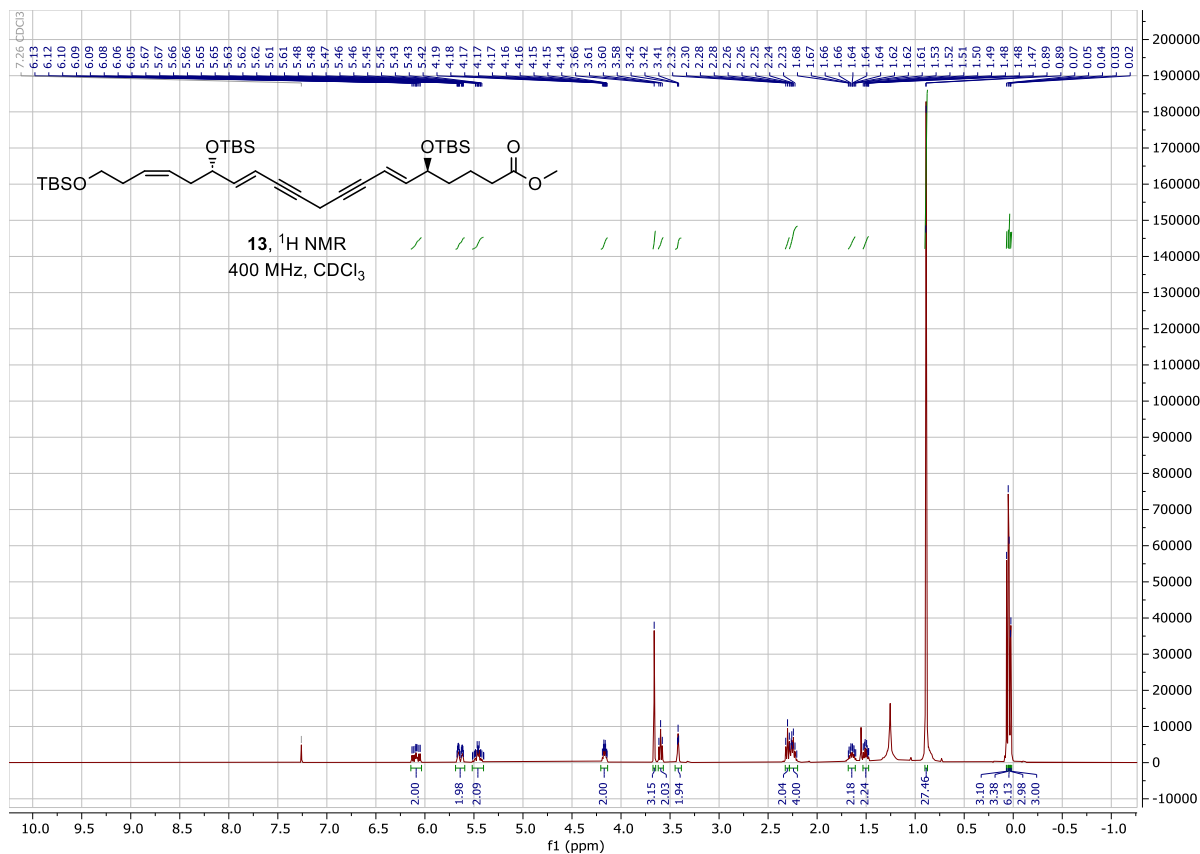

Figure S3  $^1\text{H}$  NMR spectrum of diyne **13**.

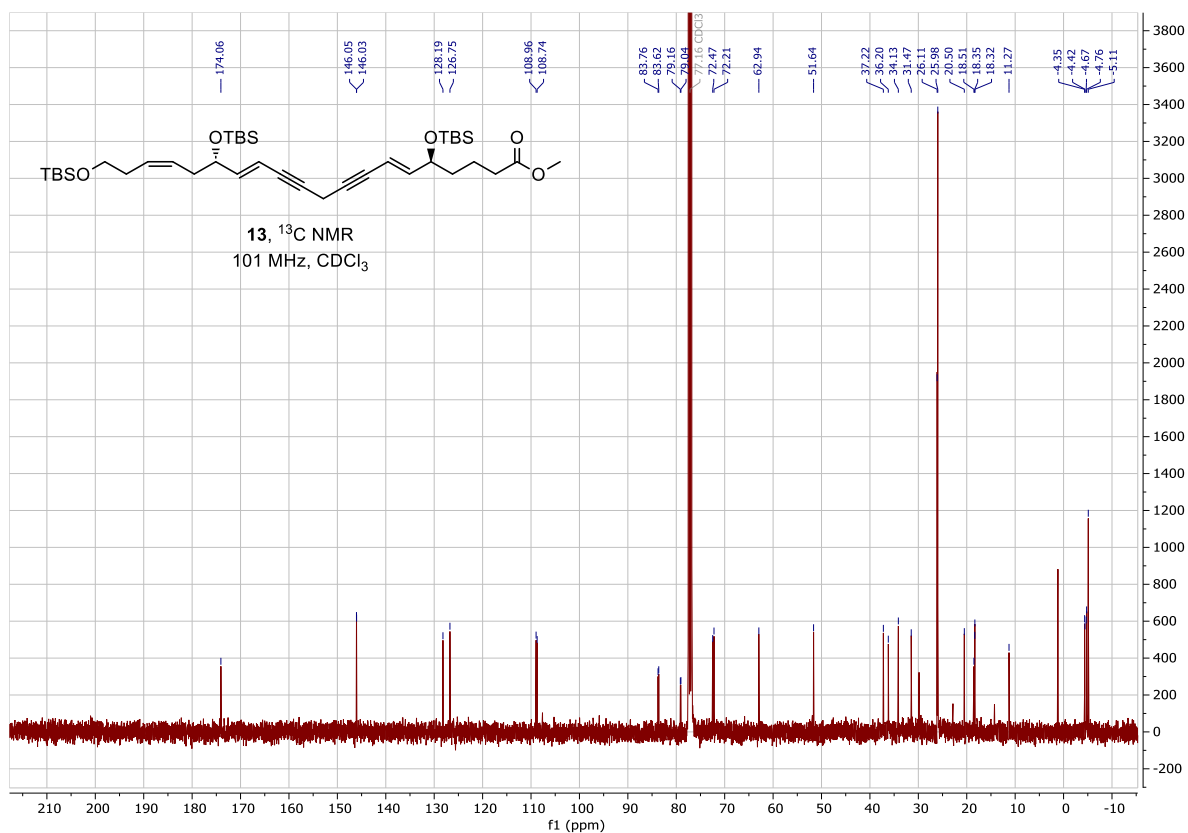

Figure S4  $^{13}\text{C}$  NMR spectrum of diyne **13**.

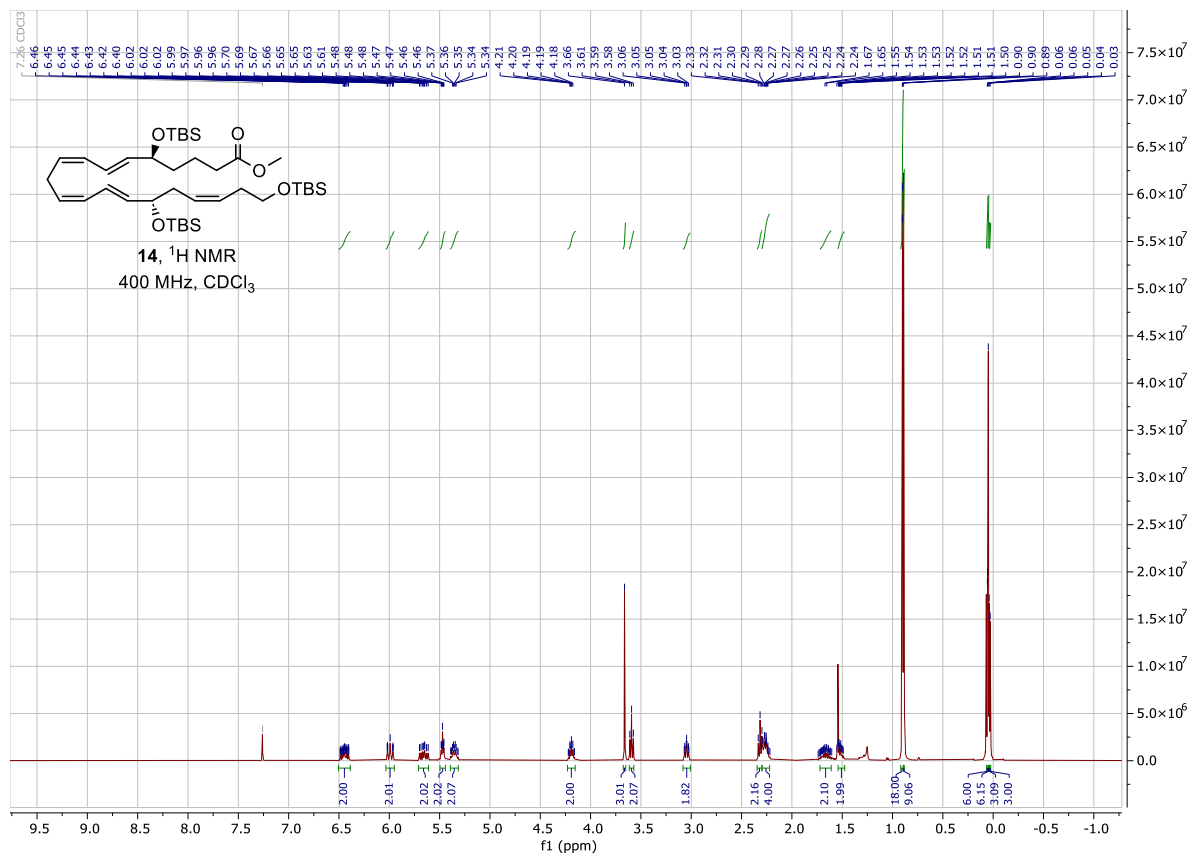

Figure S5  $^1\text{H}$  NMR spectrum of compound 14.

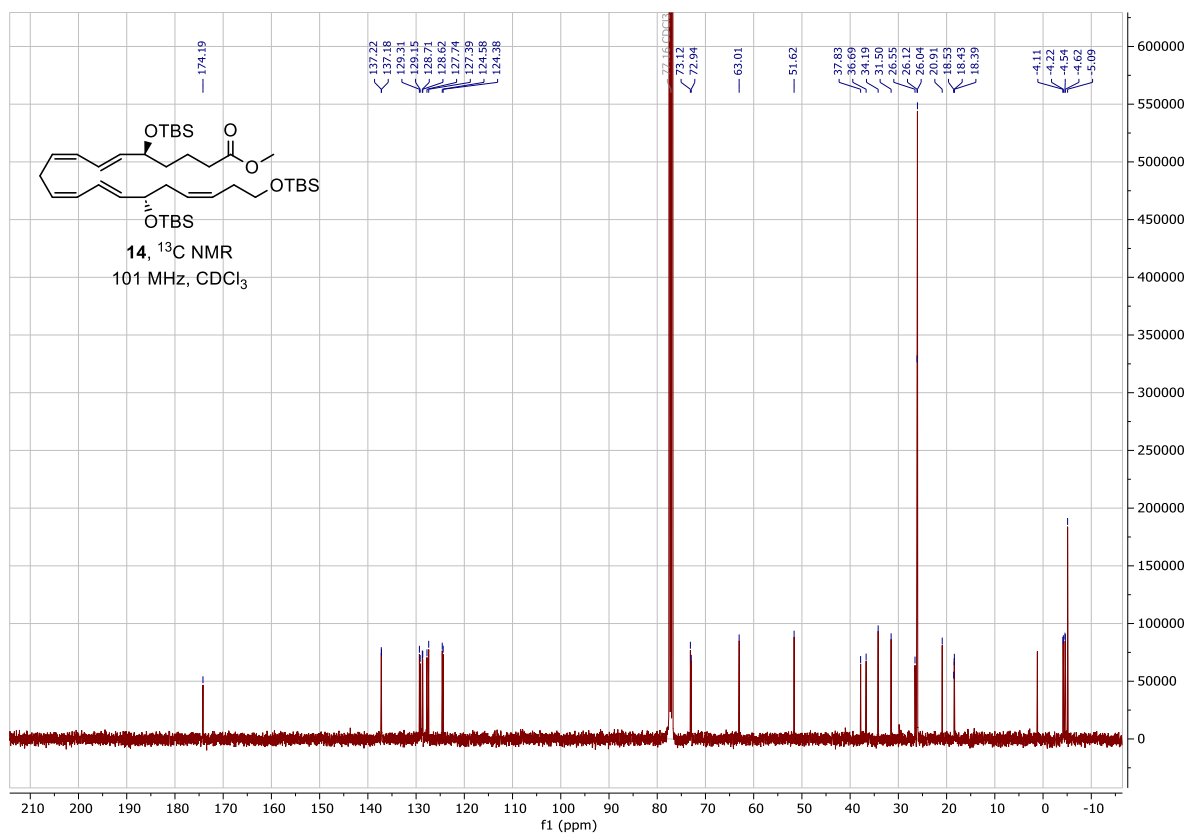

Figure S6  $^{13}\text{C}$  NMR spectrum of compound 14.

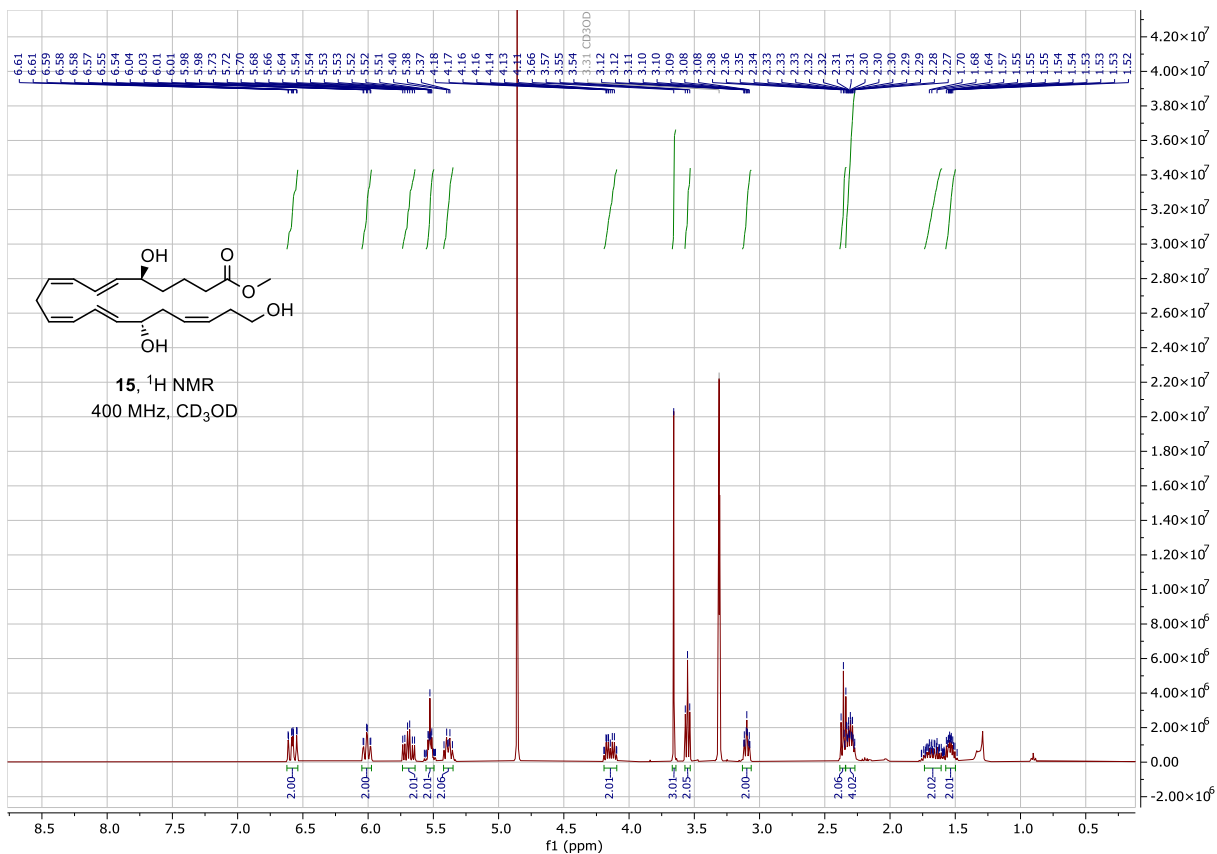

**Figure S7** <sup>1</sup>H NMR spectrum of 20-OH-RvE4 methyl ester (**15**).

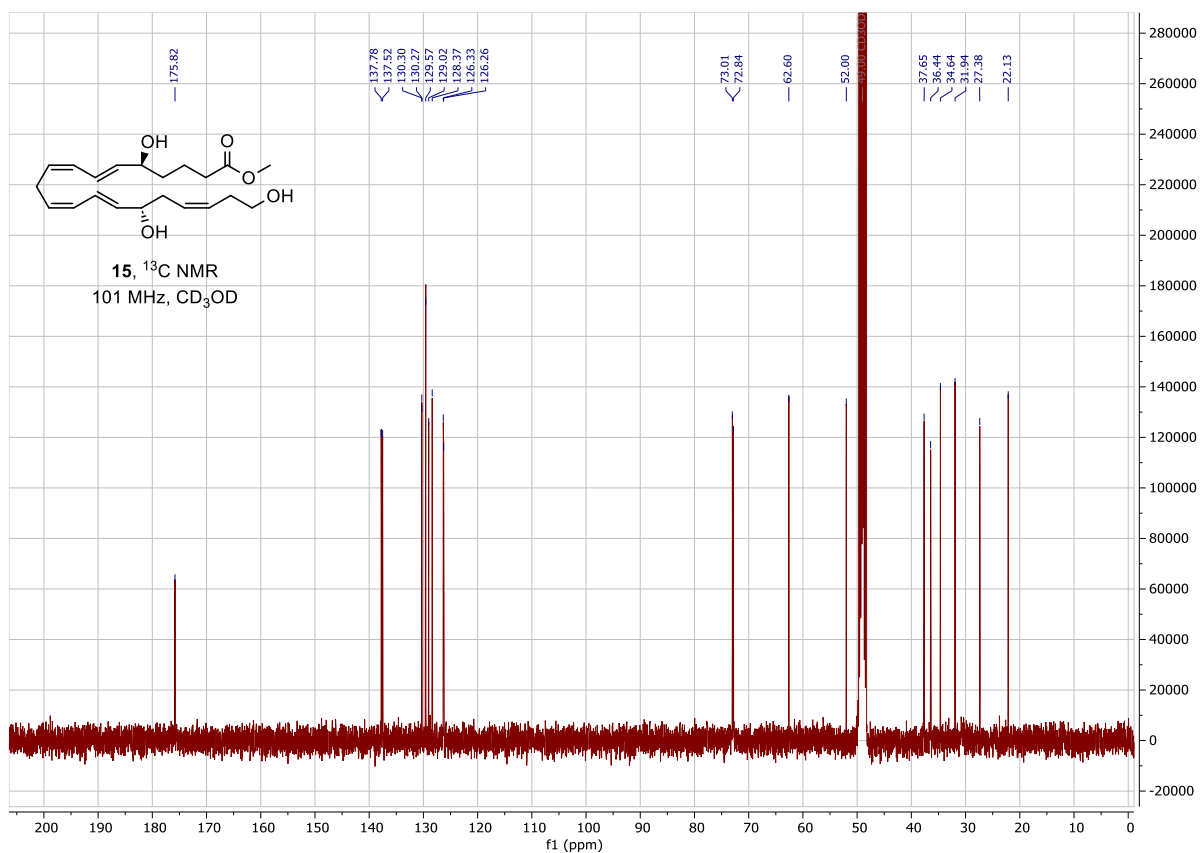

**Figure S8** <sup>13</sup>C NMR spectrum of 20-OH-RvE4 methyl ester (**15**).

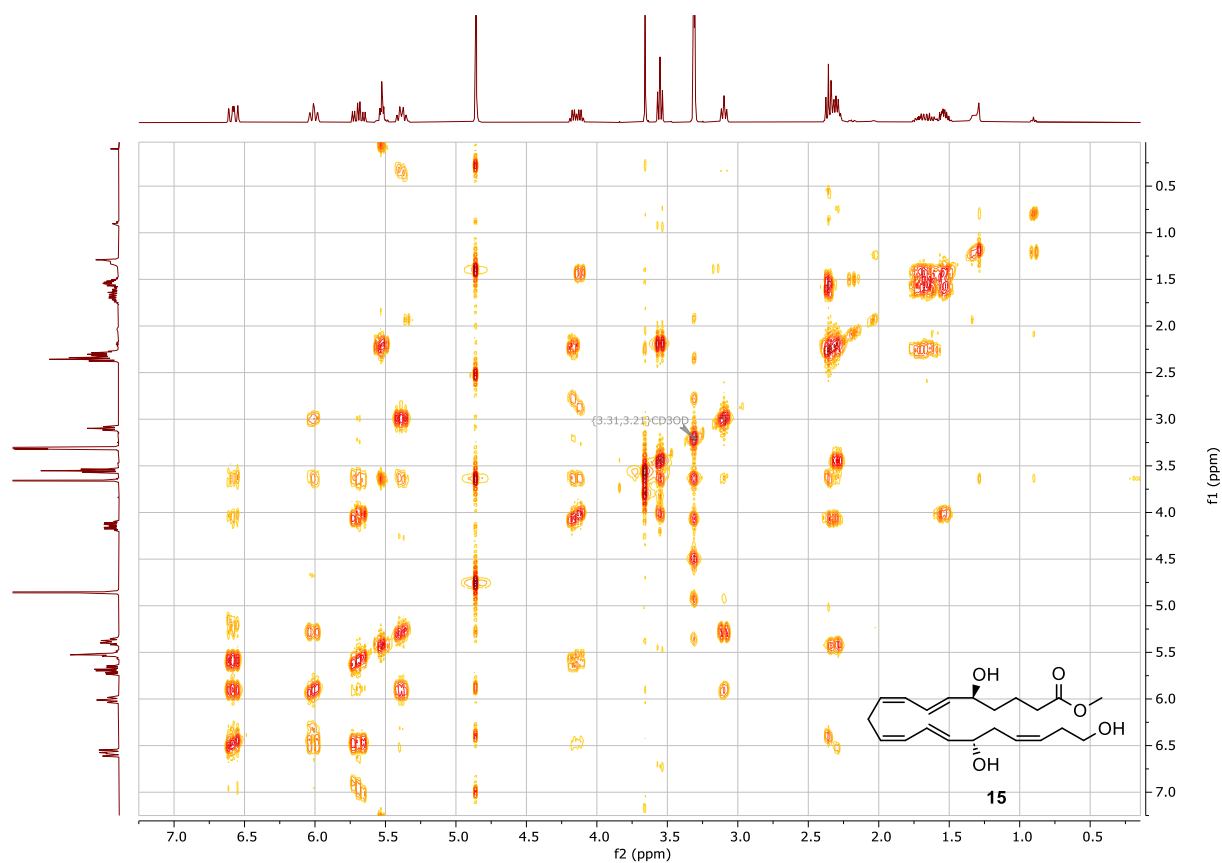

Figure S9 COSY NMR spectrum of 20-OH-RvE4 methyl ester (15).

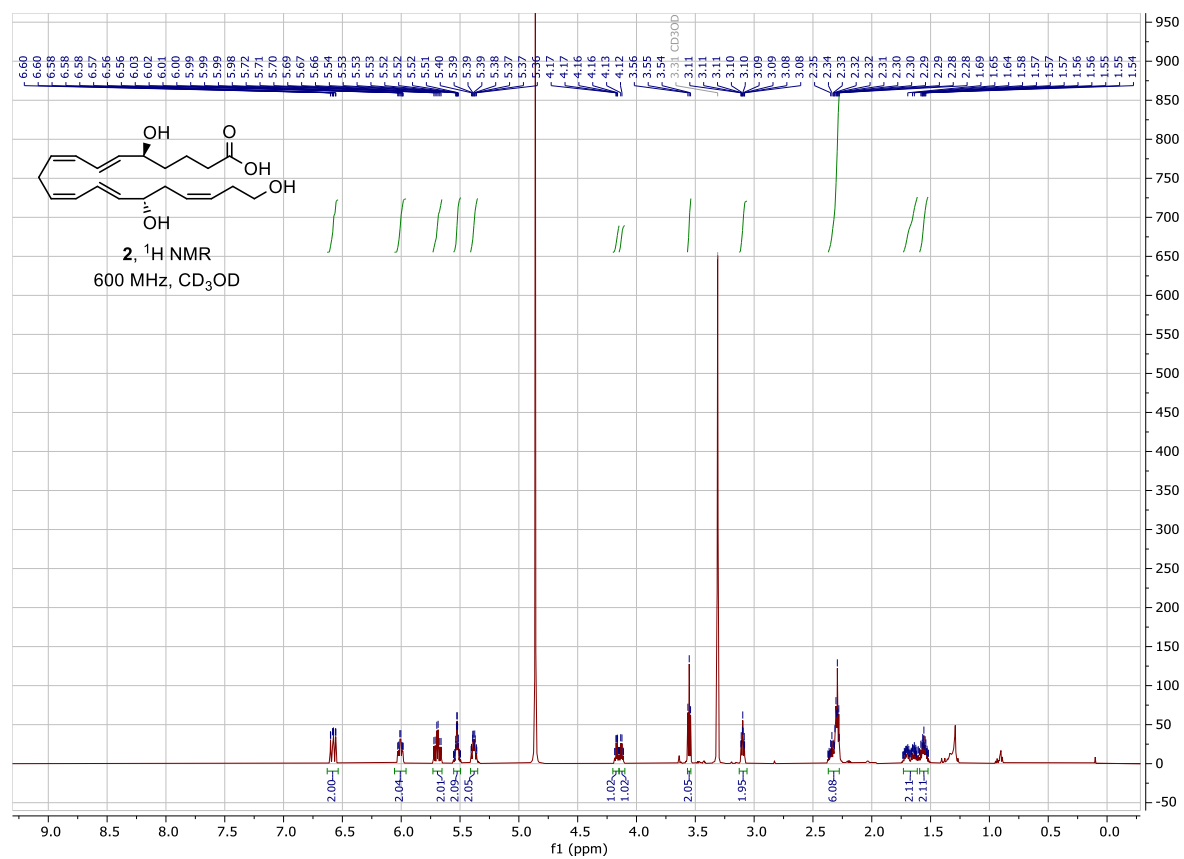

Figure S10  $^1\text{H}$  NMR spectrum of 20-OH-RvE4 (2).

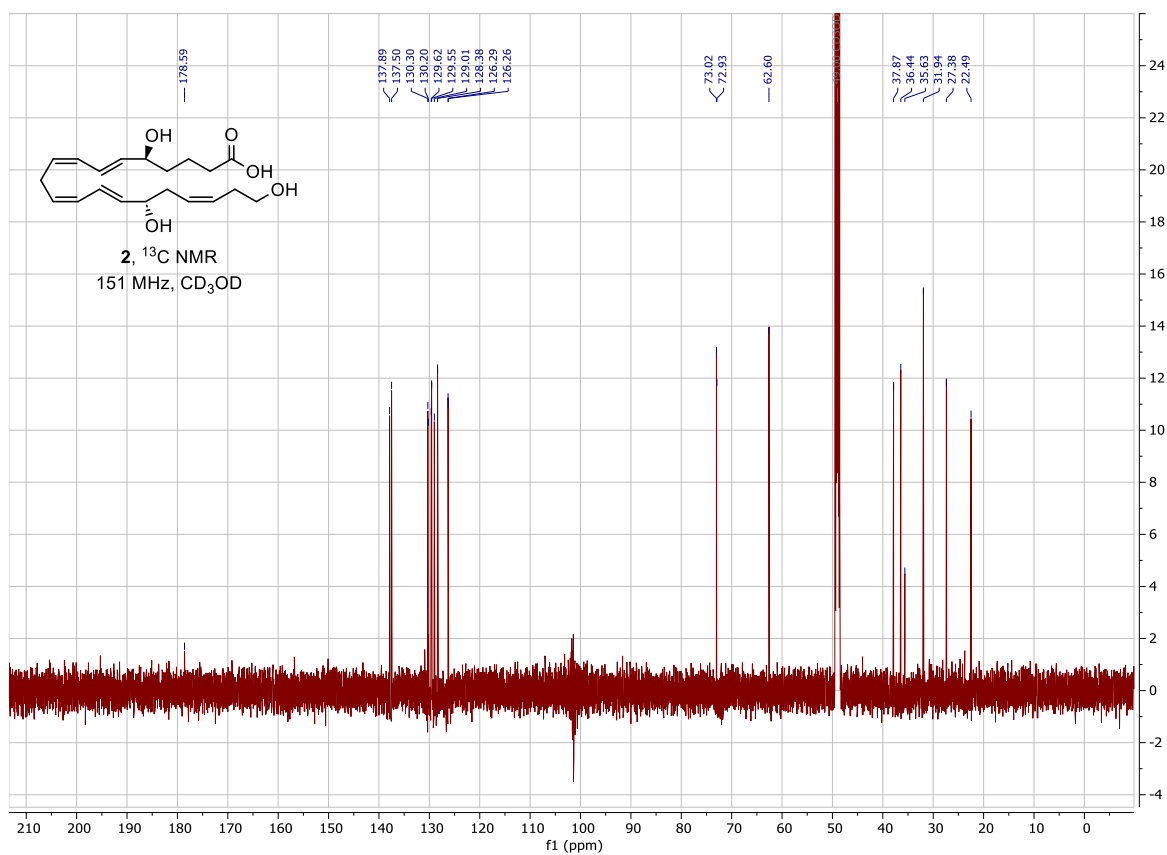

Figure S11  $^{13}\text{C}$  NMR spectrum of 20-OH-RvE4 (**2**).

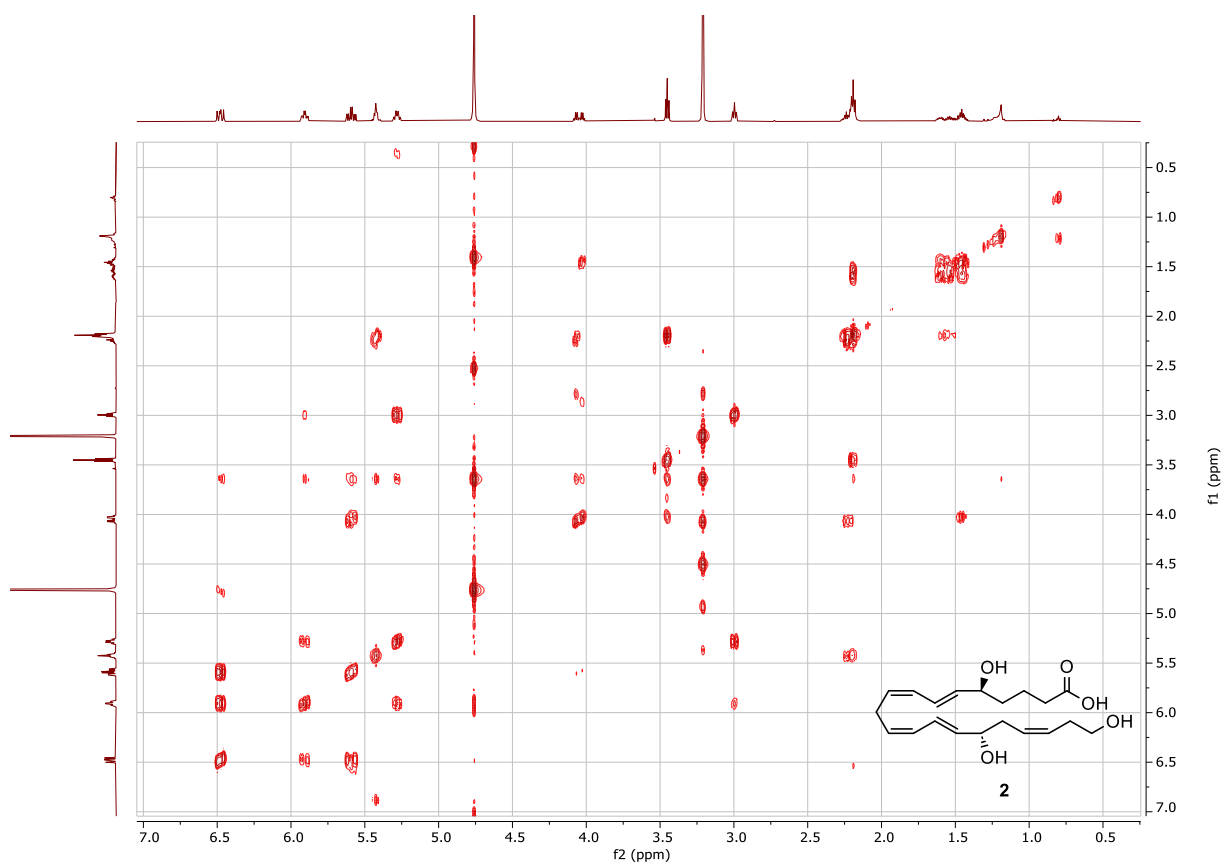

Figure S12 COSY NMR spectrum of 20-OH-RvE4 (**2**).



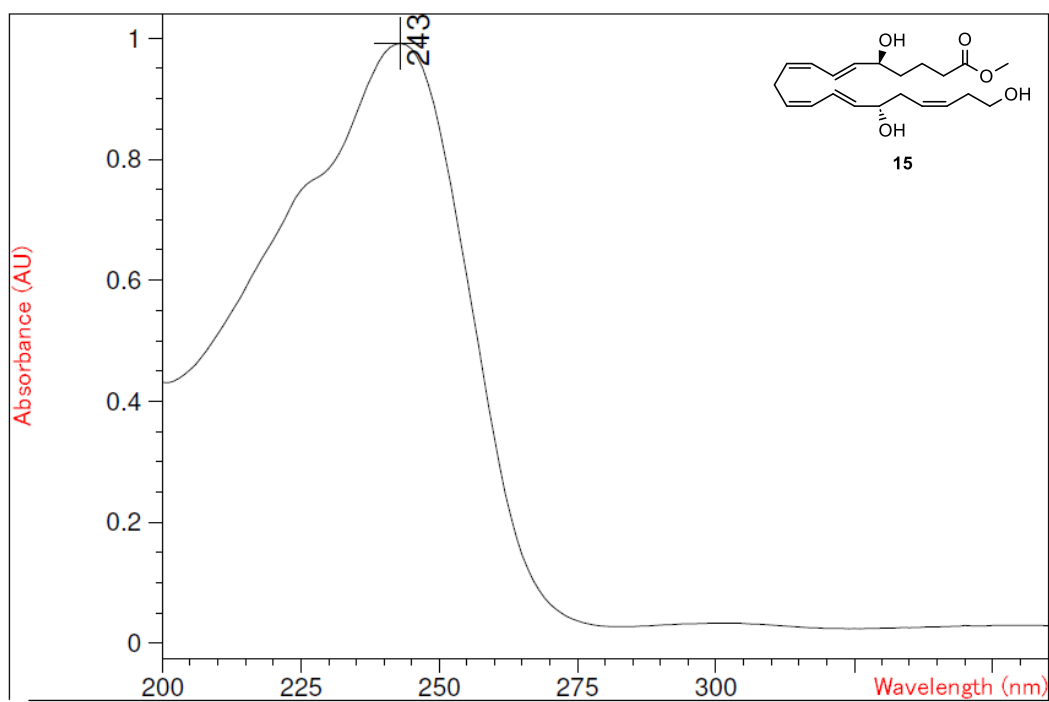

**Figure S13** UV-Vis spectrum of 20-OH-RvE4 methyl ester (**15**).

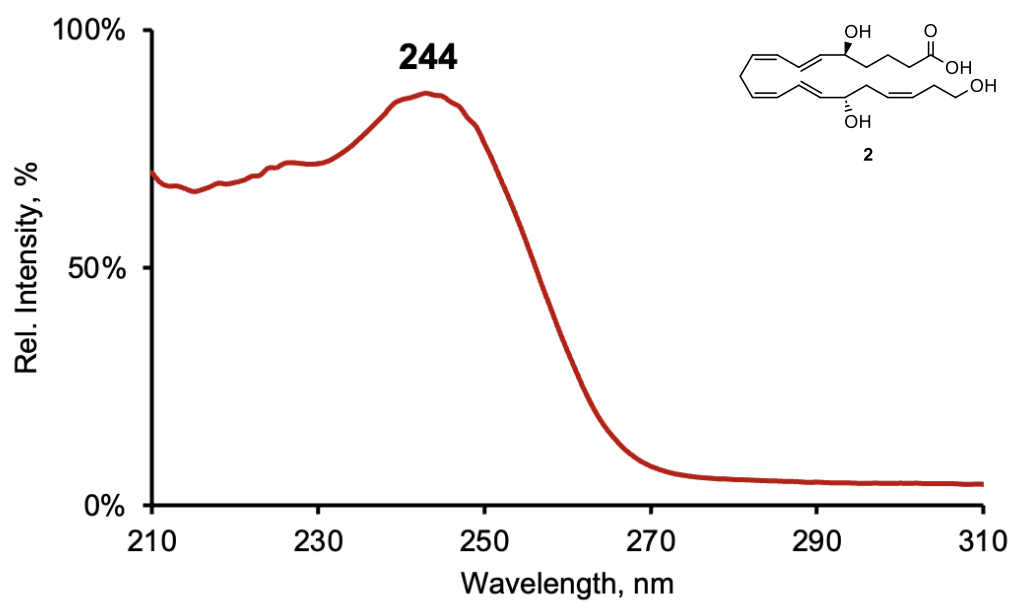

**Figure S14** UV-Vis spectrum of 20-OH-RvE4 (**2**).

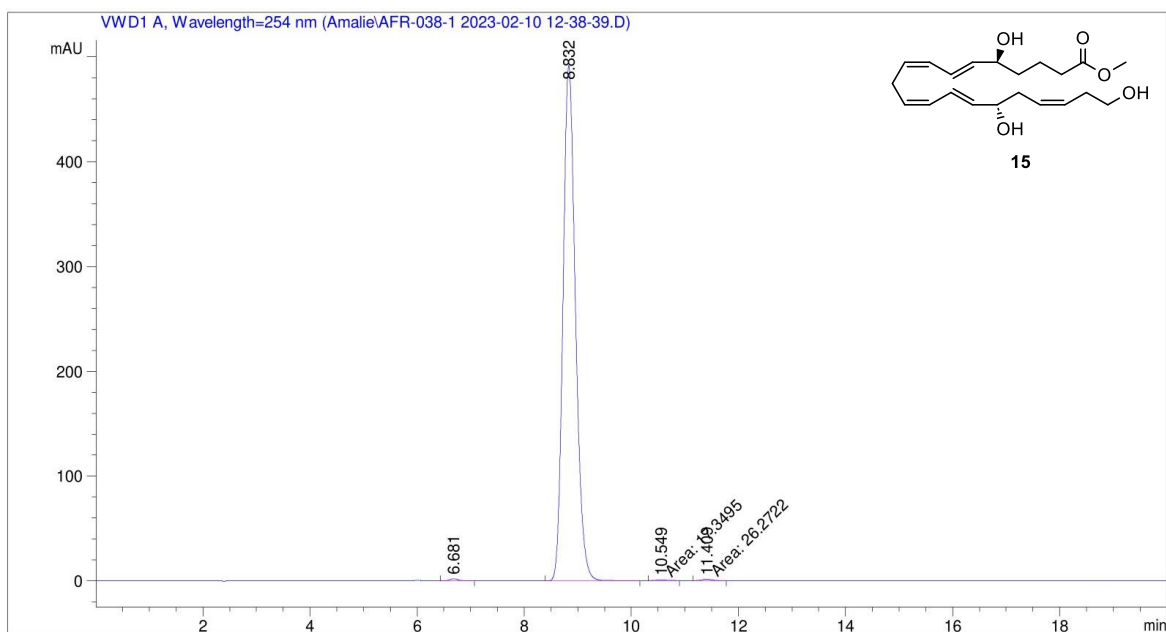

=====  
 Area Percent Report  
 =====

Sorted By : Signal  
 Multiplier : 1.0000  
 Dilution : 1.0000  
 Use Multiplier & Dilution Factor with ISTDs

Signal 1: VWD1 A, Wavelength=254 nm

| Peak # | RetTime [min] | Type | Width [min] | Area [mAU*s] | Height [mAU] | Area %  |
|--------|---------------|------|-------------|--------------|--------------|---------|
| 1      | 6.681         | BB   | 0.1853      | 25.81602     | 2.13224      | 0.3221  |
| 2      | 8.832         | BB   | 0.2486      | 7944.28320   | 491.30557    | 99.1335 |
| 3      | 10.549        | MM   | 0.3362      | 17.34955     | 8.60068e-1   | 0.2165  |
| 4      | 11.409        | MM   | 0.2974      | 26.27220     | 1.47254      | 0.3278  |

Totals : 8013.72097 495.77042

**Figure S15** HPLC spectrum of 20-OH-RvE4 methyl ester (**15**).

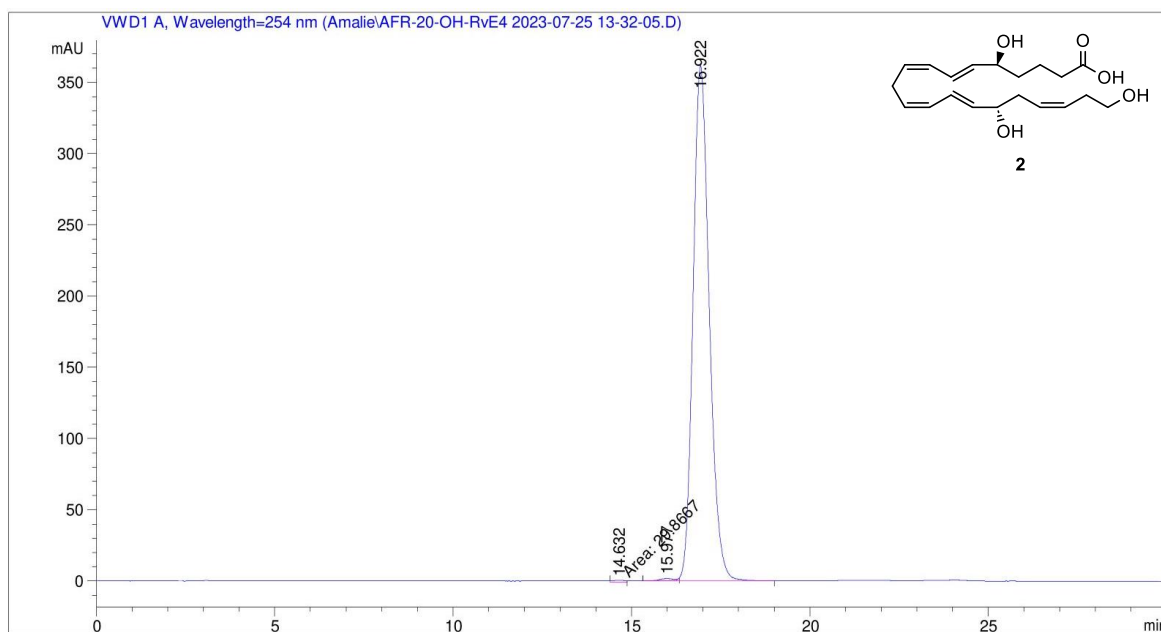

=====  
 Area Percent Report  
 =====

Sorted By : Signal  
 Multiplier : 1.0000  
 Dilution : 1.0000  
 Use Multiplier & Dilution Factor with ISTDs

Signal 1: VWD1 A, Wavelength=254 nm

| Peak # | RetTime [min] | Type | Width [min] | Area [mAU*s] | Height [mAU] | Area %  |
|--------|---------------|------|-------------|--------------|--------------|---------|
| 1      | 14.632        | MM   | 0.4446      | 29.86674     | 1.11974      | 0.2596  |
| 2      | 15.977        | BV E | 0.4032      | 46.15731     | 1.73728      | 0.4011  |
| 3      | 16.922        | VB R | 0.4882      | 1.14305e4    | 361.63113    | 99.3393 |

Totals :                      1.15066e4    364.48815

**Figure S16** HPLC spectrum of 20-OH-RvE4 (2).

**Acquisition Parameter**

|             |            |                      |        |                  |           |
|-------------|------------|----------------------|--------|------------------|-----------|
| Source Type | ESI        | Set Capillary        | 3500 V | Set Nebulizer    | 2.0 Bar   |
| Focus       | Not active | Set End Plate Offset | -500 V | Set Dry Heater   | 200 °C    |
| Scan Begin  | 50 m/z     | Set Charging Voltage | 2000 V | Set Dry Gas      | 4.0 l/min |
| Scan End    | 1500 m/z   | Set Corona           | 0 nA   | Set Divert Valve | Waste     |
|             |            |                      |        | Set APCI Heater  | 0 °C      |

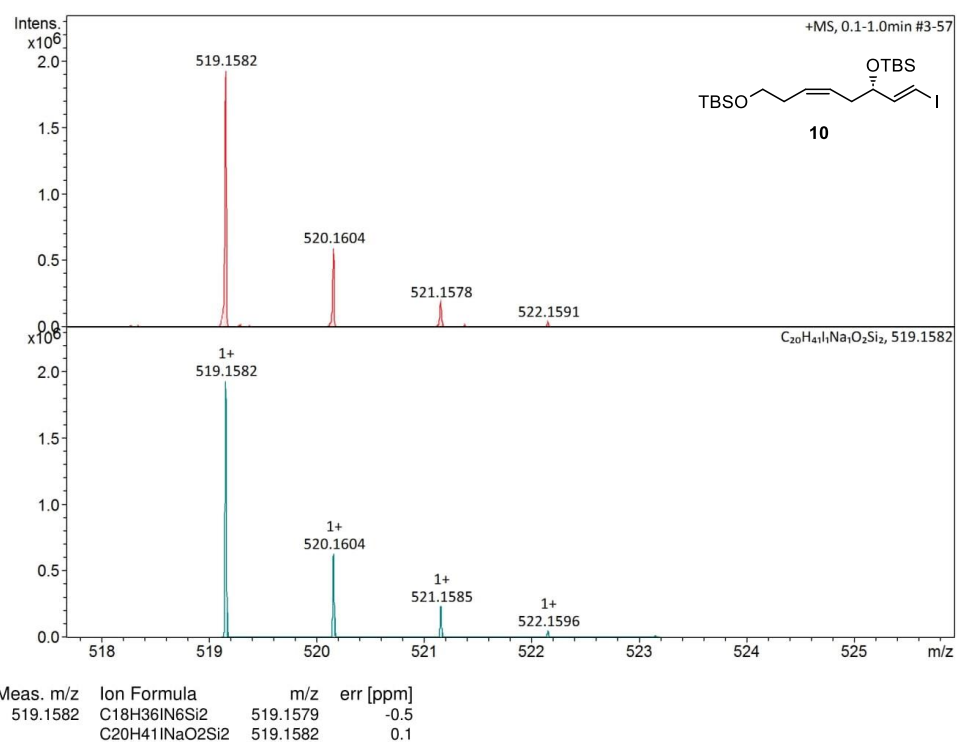**Figure S17** HRMS spectrum of compound **10**.

**Acquisition Parameter**

|             |            |                      |        |                  |           |
|-------------|------------|----------------------|--------|------------------|-----------|
| Source Type | ESI        | Set Capillary        | 3500 V | Set Nebulizer    | 2.0 Bar   |
| Focus       | Not active | Set End Plate Offset | -500 V | Set Dry Heater   | 200 °C    |
| Scan Begin  | 50 m/z     | Set Charging Voltage | 2000 V | Set Dry Gas      | 4.0 l/min |
| Scan End    | 1500 m/z   | Set Corona           | 0 nA   | Set Divert Valve | Waste     |
|             |            |                      |        | Set APCI Heater  | 0 °C      |

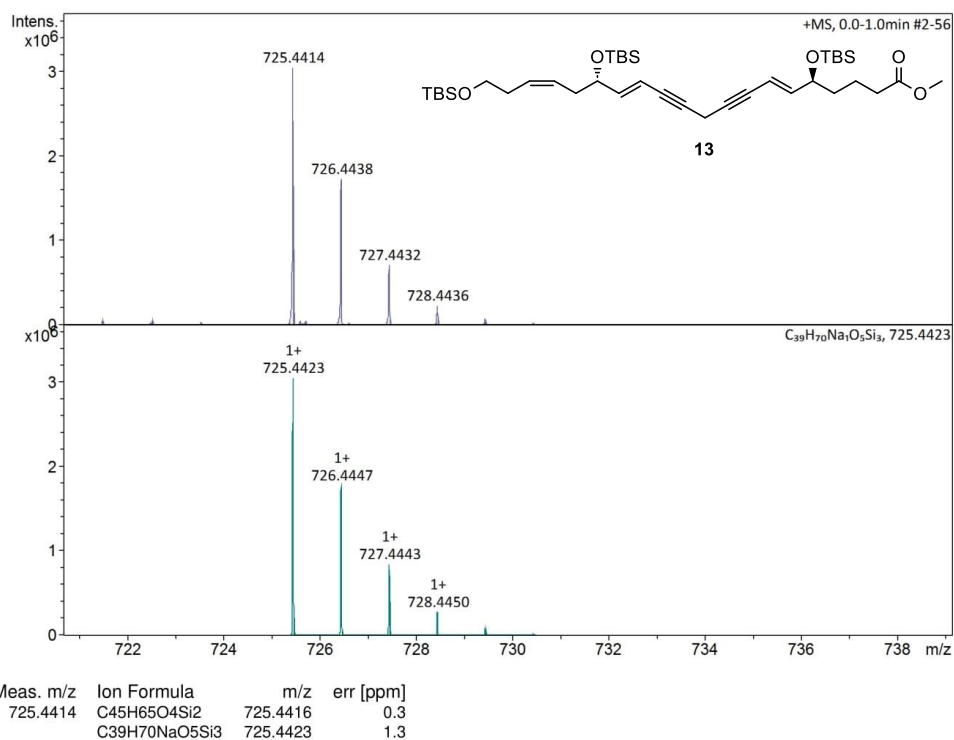

**Figure S18** HRMS spectrum of compound 13.

**Acquisition Parameter**

|             |            |                      |        |                  |           |
|-------------|------------|----------------------|--------|------------------|-----------|
| Source Type | ESI        | Set Capillary        | 3500 V | Set Nebulizer    | 0.5 Bar   |
| Focus       | Not active | Set End Plate Offset | -500 V | Set Dry Heater   | 200 °C    |
| Scan Begin  | 50 m/z     | Set Charging Voltage | 2000 V | Set Dry Gas      | 4.0 l/min |
| Scan End    | 1500 m/z   | Set Corona           | 0 nA   | Set Divert Valve | Waste     |
|             |            |                      |        | Set APCI Heater  | 0 °C      |

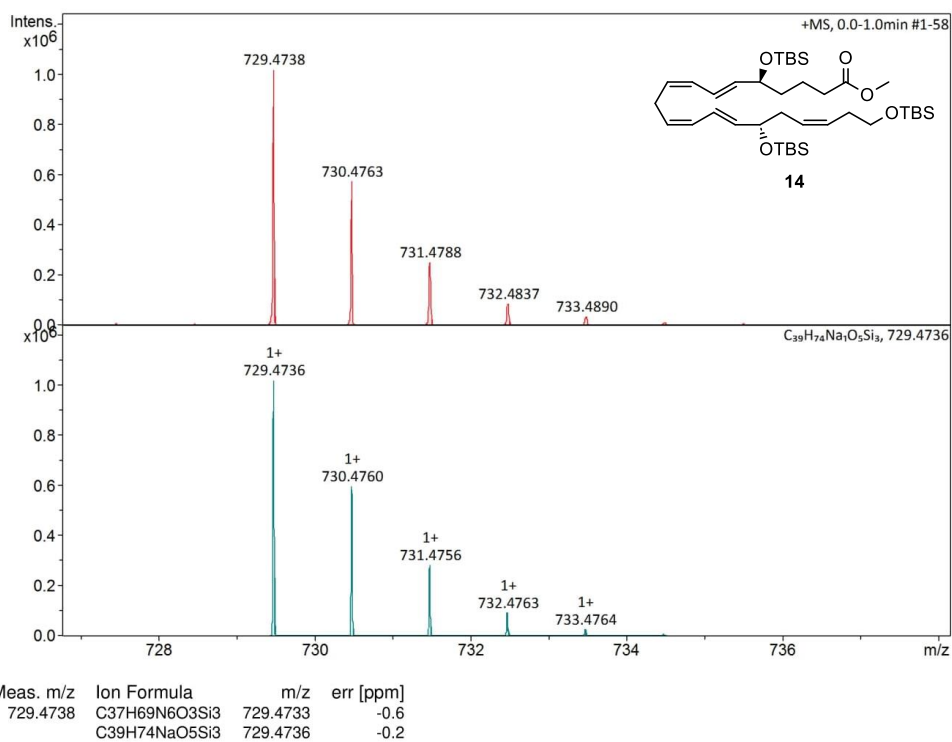

**Figure S19** HRMS spectrum of compound **14**.

**Acquisition Parameter**

|             |            |                      |        |                  |           |
|-------------|------------|----------------------|--------|------------------|-----------|
| Source Type | ESI        | Set Capillary        | 3500 V | Set Nebulizer    | 1.0 Bar   |
| Focus       | Not active | Set End Plate Offset | -500 V | Set Dry Heater   | 200 °C    |
| Scan Begin  | 50 m/z     | Set Charging Voltage | 2000 V | Set Dry Gas      | 4.0 l/min |
| Scan End    | 1500 m/z   | Set Corona           | 0 nA   | Set Divert Valve | Waste     |
|             |            |                      |        | Set APCI Heater  | 0 °C      |

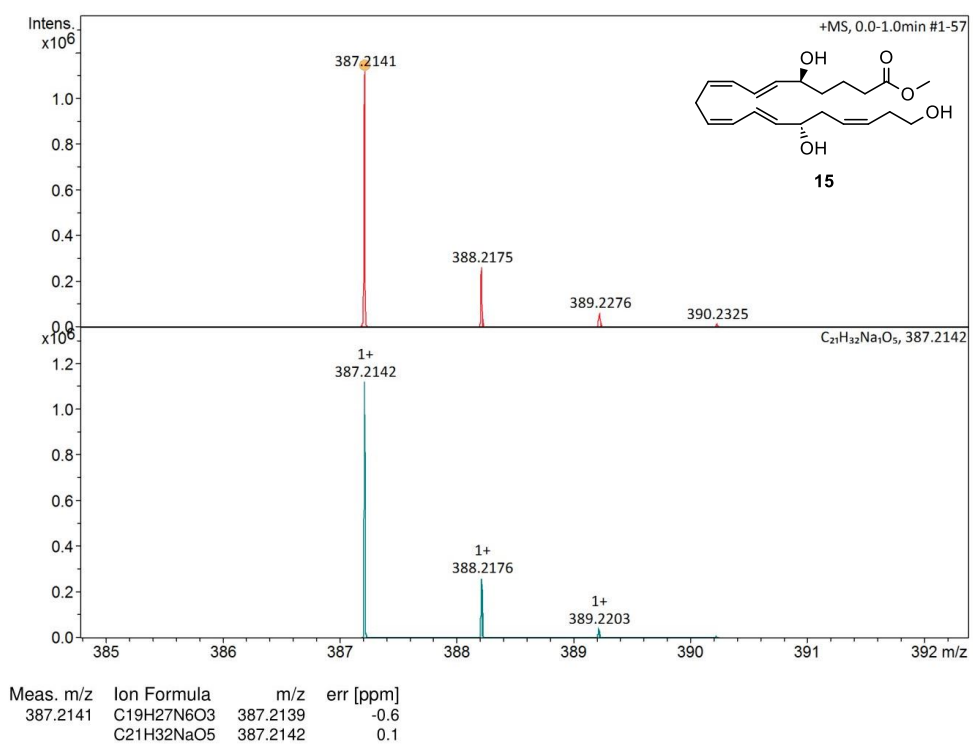

**Figure S20** HRMS spectrum of 20-OH-RvE4 methyl ester (**15**).

**Acquisition Parameter**

|             |            |                      |        |                  |           |
|-------------|------------|----------------------|--------|------------------|-----------|
| Source Type | ESI        | Set Capillary        | 3500 V | Set Nebulizer    | 0.5 Bar   |
| Focus       | Not active | Set End Plate Offset | -500 V | Set Dry Heater   | 200 °C    |
| Scan Begin  | 50 m/z     | Set Charging Voltage | 0 V    | Set Dry Gas      | 4.0 l/min |
| Scan End    | 1500 m/z   | Set Corona           | 0 nA   | Set Divert Valve | Source    |
|             |            |                      |        | Set APCI Heater  | 0 °C      |

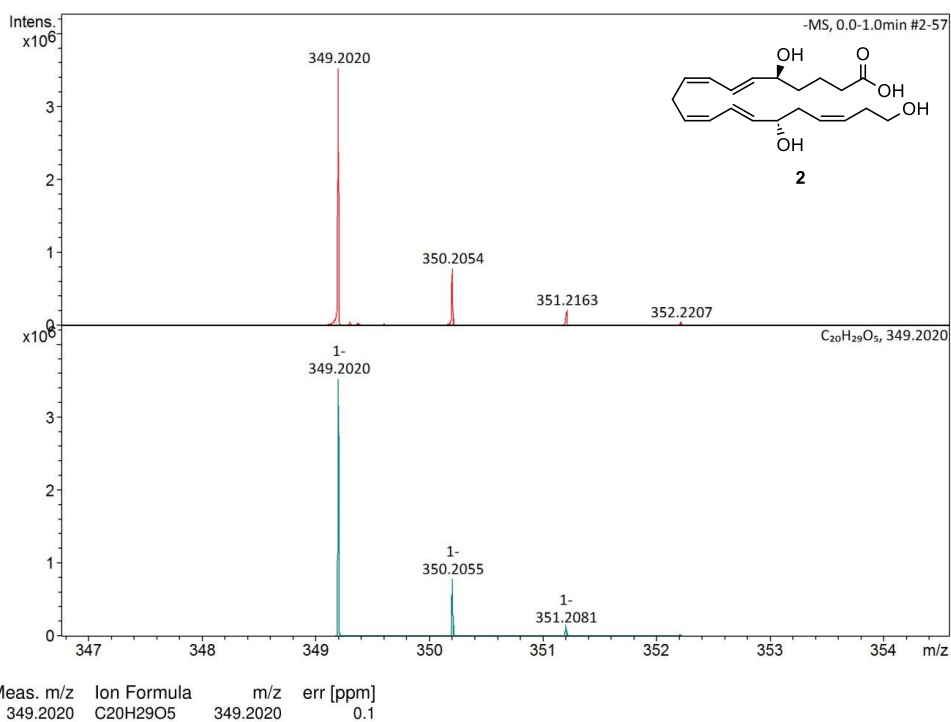

**Figure S21** HRMS spectrum of 20-OH-RvE4 (**2**).
